# Supplementary material for: Western Ghats Endemic Euphaea fraseri Forms the Basal Lineage of the Euphaea Clade, Supporting an Out-of-India Origin for the Genus
Source: Research Square preprint supplement (doi:10.21203/rs.3.rs-8452342/v1), 2026-01-28
Supplement: Supplementary file 1 [file d79ea7ddf840fbec494145ad.docx]

| **Species (Mitogenome)** | **Accession code** |
| --- | --- |
| *Mesopodagrion tibetanum* | MK951671 |
| *Pseudolestes mirabilis* | NC_020636 |
| *Bayadera hyalina* | OR966637 |
| *Dysphaea basitincta* | OR966683 |
| *Euphaea decorata* | NC_026058 |
| *Euphaea ornata* | NC_026059 |
| *Euphaea ochracea* | NC_065215 |
| *Euphaea formosa* | NC_014493 |
| *Euphaea yayeyamana* | NC_026057 |
| *Euphaea masoni* | OR966670 |
| *Davidius lunatus* | NC_-012644 |
| *Ictinogomphus pertinax* | OR966660 |
| *Periaeschna flinti* | OR966652 |
| *Polycanthagyna melanictera* | OR966661 |

**Supplementary tables:**

Supplementary table 1: Accession codes for the Mitochondrial genome obtained from GenBank.

| **Species (Concatenated)** | **Accession code COI** | **Accession code 16s rRNA** |
| --- | --- | --- |
| *Anisopleura furcata* | KF369297.1 | KF369617.1 |
| *Anisopleura quingyuanensis* | KF369298.1 | KF369618.1 |
| *Bayadera brevicauda* | AB564541.1 | LC366357.1 |
| *Bayadera indica* | MN255522.1 | LC194793.1 |
| *Bayadera ishigakiana* | AB564542.1 | AB707488.1 |
| *Dysphaea dimidiata* | KP979499.1 | KP979523.1 |
| *Dysphaea gloriosa* | MN518140.1 | KP979524.1 |
| *Euphaea decorata* | KP979511.1 | KP979531.1 |
| *Euphaea formosa* | EU603569.1 | LC366358.1 |
| *Euphaea impar* | KF369388.1 | KF369721.1 |
| *Euphaea superba* | MH064397.1 | KF369722.1 |
| *Euphaea yayeyamana* | EU603574.1 | AB707490.1 |
| *Crocothemis servilia* | PP938710.1 | LC366426.1 |
| *Trithemis aurora* | MF358784.1 | AB708294.1 |

Supplementary table 2: Accession codes for the COI and 16s rRNA sequences obtained from the GenBank.
